# Supplementary material
Source: MDPI journal article supplement (https://www.mdpi.com/2073-4433/13/3/480)
Supplement: s1 [file s1]

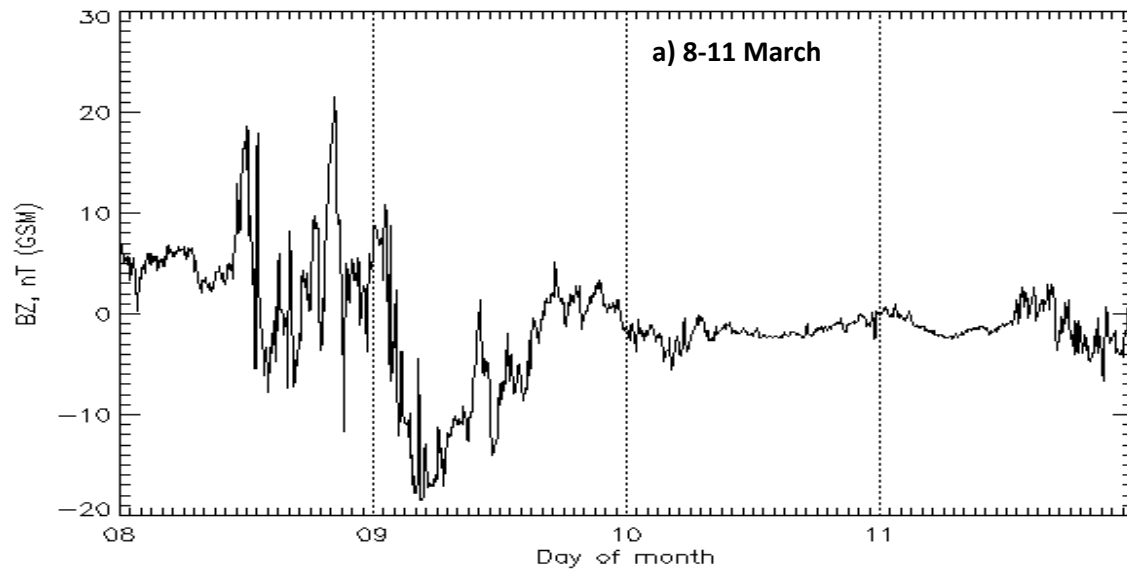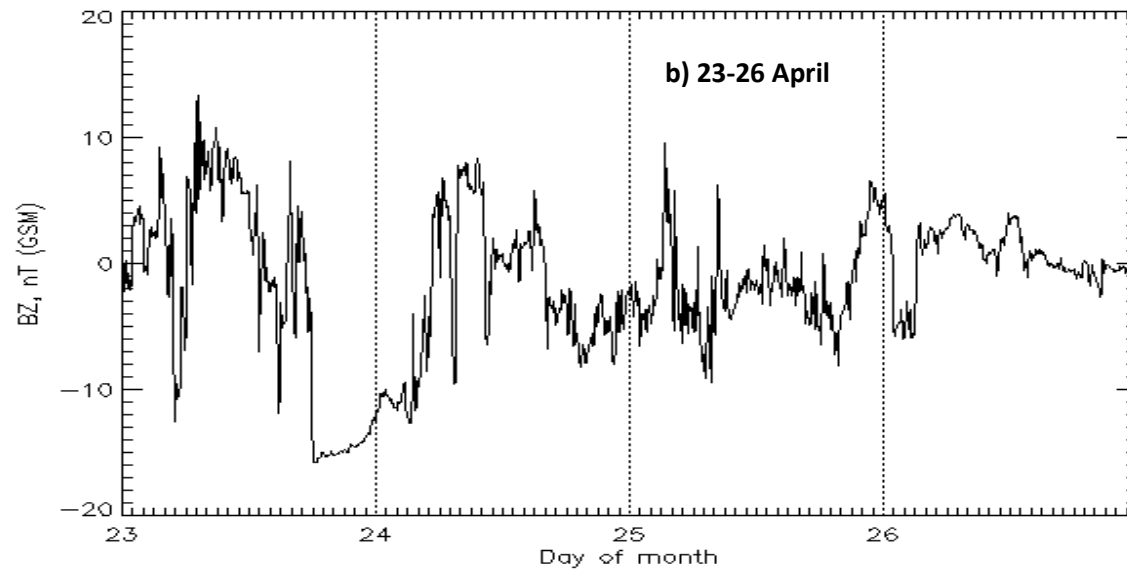

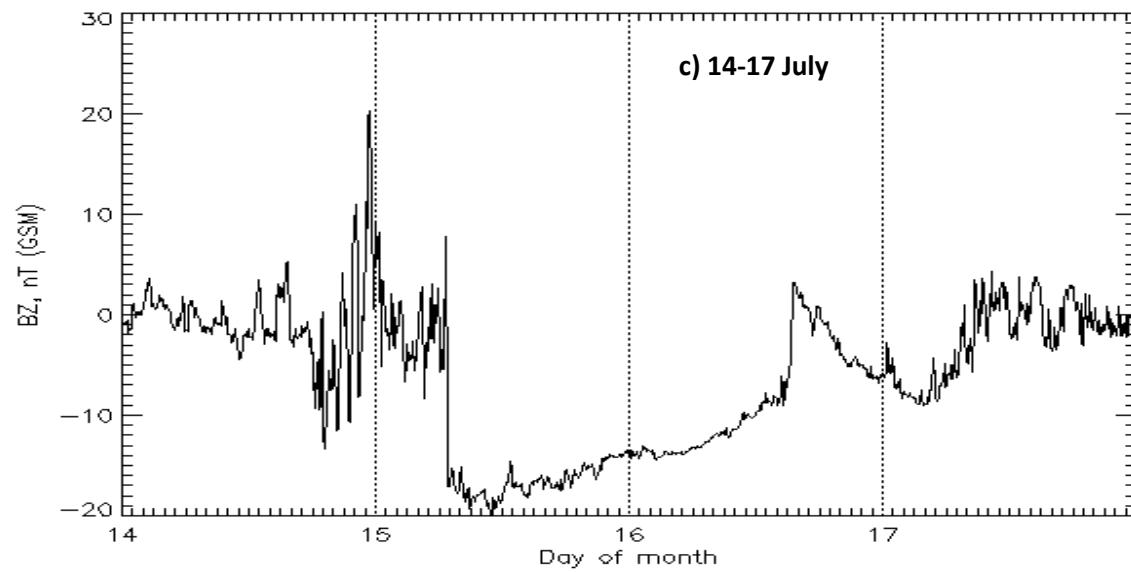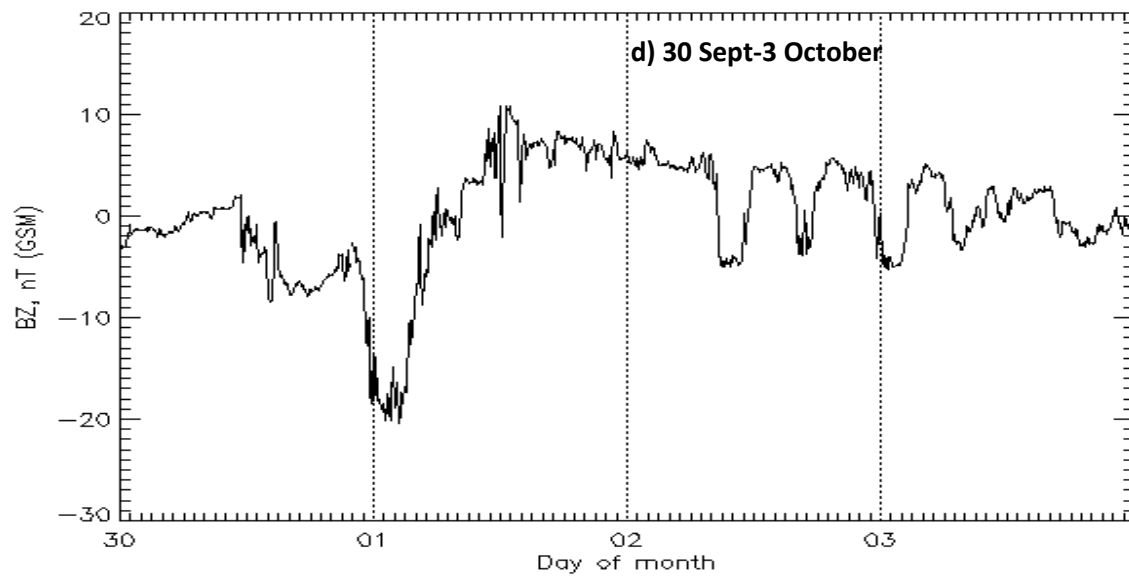

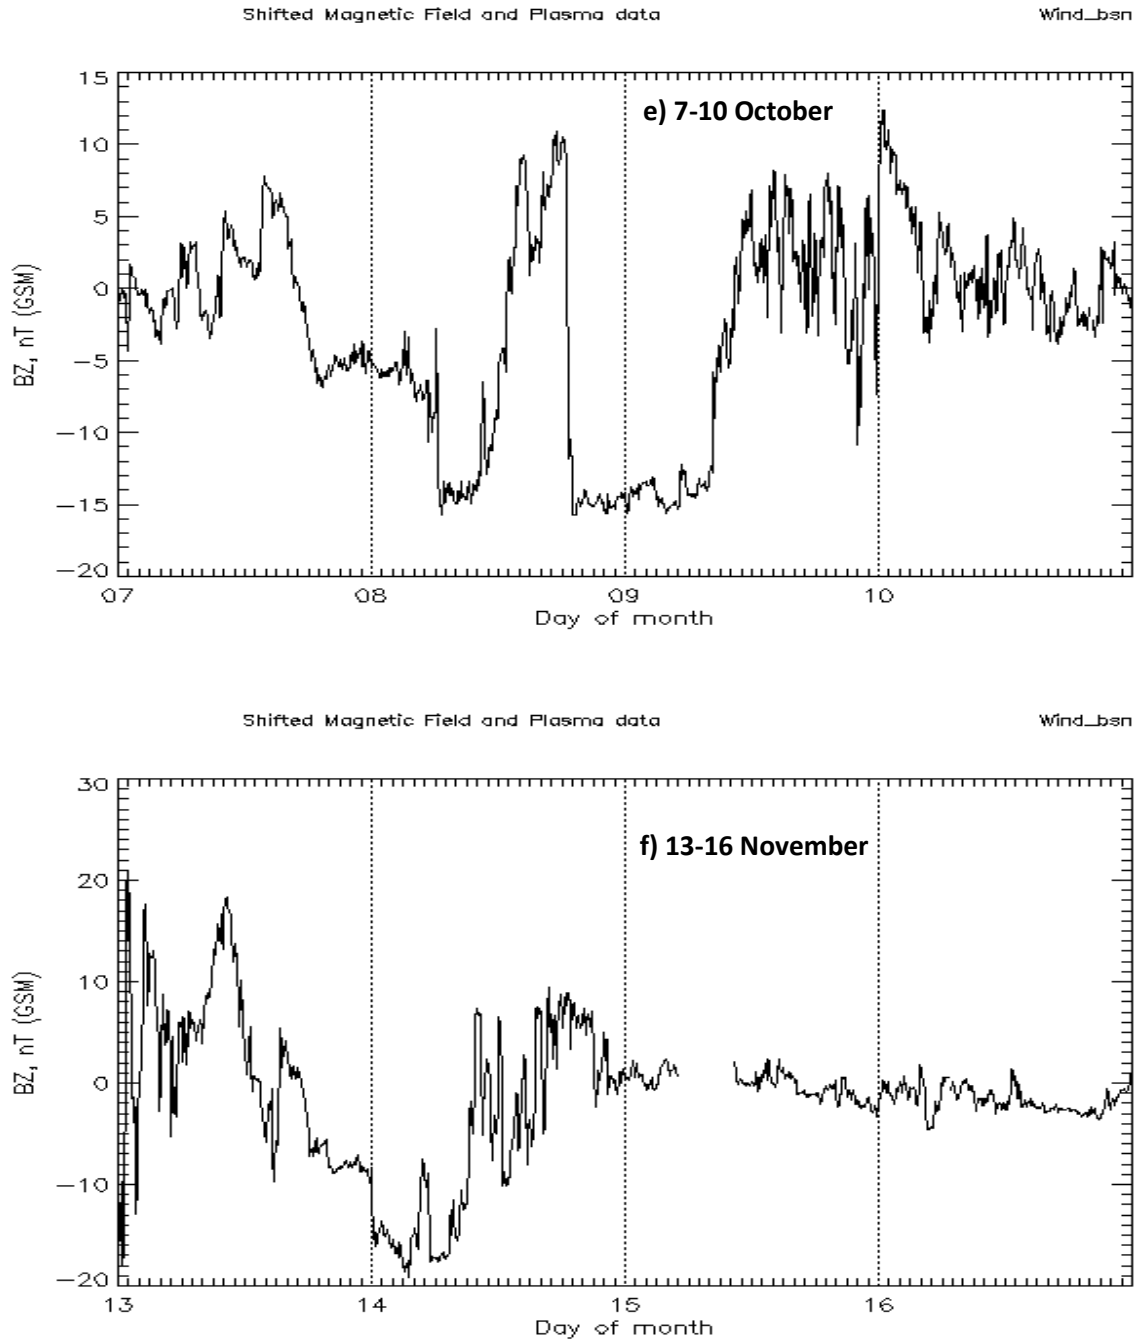

**Figure S1:** The IMF  $B_z$  variations during the magnetic storms: a) 8-9 March, b) 23-24 April and c) 14-15 July 2012. d) 30 Sept-3 October, e) 7-10 October and f) 13-16 November 2012.
